# Supplementary material for: Effect of strain on voltage-controlled magnetism in BiFeO3-based heterostructures
Source: PubMed Central journal article supplement — Sci Rep. 2014 Apr 1;4:4553. doi: 10.1038/srep04553 (PMC3971450; doi:10.1038/srep04553), 2014-04-01
Supplement: srep04553-s1.pdf [file srep04553-s1.pdf]

## Supplemental Materials

### Effect of strain on voltage-controlled magnetism in BiFeO<sub>3</sub>-based heterostructures

J. J. Wang<sup>1,a)</sup>, J. M. Hu<sup>1,2\*,a)</sup>, T. N. Yang<sup>2</sup>, M. Feng<sup>1</sup>, L. Q. Chen<sup>1,2</sup>, C. W. Nan<sup>1\*</sup>

<sup>1</sup>*State Key Lab of New Ceramics and Fine Processing, School of Materials Science and Engineering,*

*Tsinghua University, Beijing, 100084, China*

<sup>2</sup>*Department of Materials Science and Engineering, The Pennsylvania State University, University*

*Park, Pennsylvania, 16802, USA*

<sup>a)</sup> These authors contribute equally.

\*correspondence should be addressed to [juh34@psu.edu](mailto:juh34@psu.edu) and [cwnan@tsinghua.edu.cn](mailto:cwnan@tsinghua.edu.cn).

### Supplemental text

Shown in figure S1(a) is the phase diagram of  $\lambda_S$  and  $h_{DM}^0$  constructed for different voltage-induced magnetic domain switching behaviors based on phase-field simulations. Typical magnetic and ferroelectric domain structures in different phase regions before and after reversing the in-plane average polarization  $\mathbf{P}_{100}$  are shown in figure S1(b). It can be seen from figure S1(a) that the range of critical value of  $h_{DM}^0$  for voltage-induced 180° magnetization reversal can be tuned by modulating  $\lambda_S$ . For instance, when  $h_{DM}^0=100$  Oe (as measured by experiment [1]), the 180° reversal should take place for the  $\lambda_S$  ranging from -7 ppm to -20 ppm. Furthermore, the region of 180° full reversal gradually shrinks with decreasing  $h_{DM}^0$ , and vanishes when  $h_{DM}^0$  is smaller than 70 Oe. In addition, there is no 180° magnetization reversal upon a positive  $\lambda_S$ , in which case the contributions from the  $\mathbf{H}_{DM}$ -field

and strain are not against each other.

## **Reference**

[1] Trassin, M. et al. Interfacial coupling in multiferroic/ferromagnet heterostructures. Phys. Rev. B 87, 134426 (2013)

## Supplemental Figures

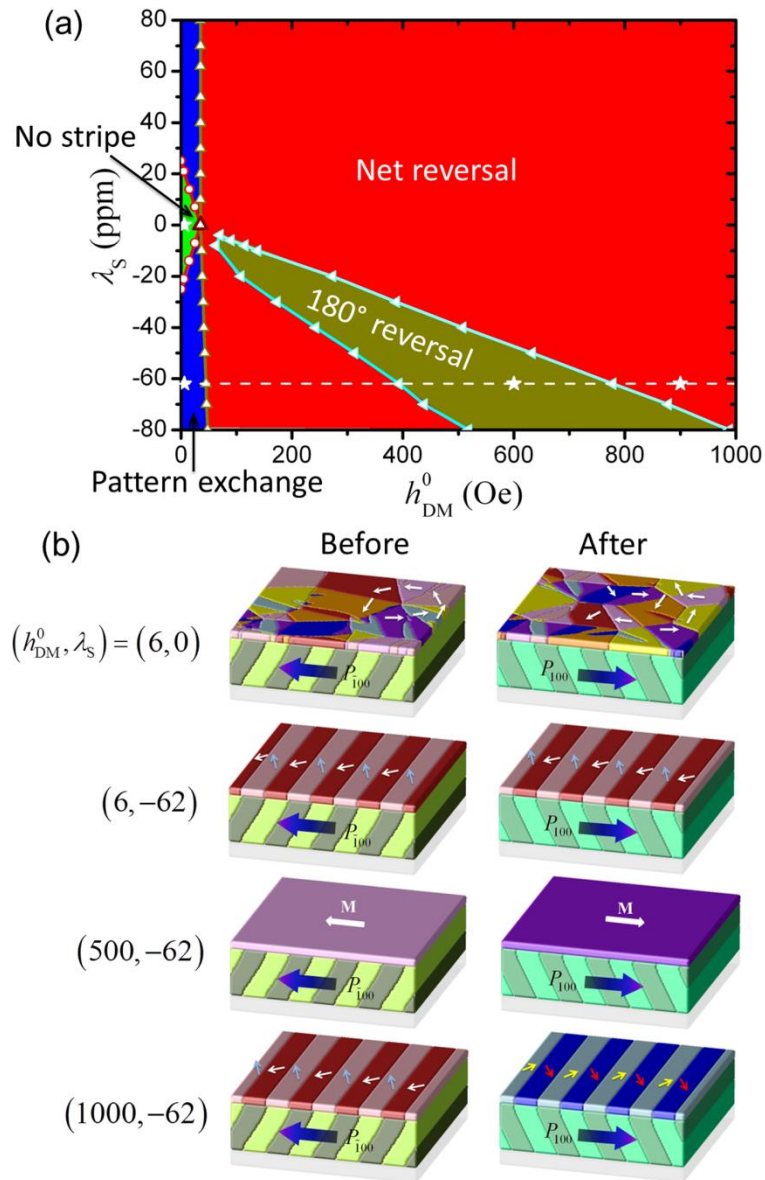

**Figure S1** (a) Phase diagram of the saturation magnetostriction coefficient  $\lambda_s$  and the magnitude of  $\mathbf{H}_{DM}$ -field  $h_{DM}^0$  for various voltage-induced magnetic domain switching behaviors, including pattern exchange of magnetic striped domain, net magnetization reversal, and full  $180^\circ$  reversal. The “no-stripe” region indicates the magnetization can neither be stabilized as striped domains nor be reversed. (b) Typical magnetic and ferroelectric domain structures for these different phase regions before and after reversing the in-plane average polarization  $\mathbf{P}_{100}$ . Corresponding values of  $\lambda_s$  and  $h_{DM}^0$  are marked by stars in the phase diagram.

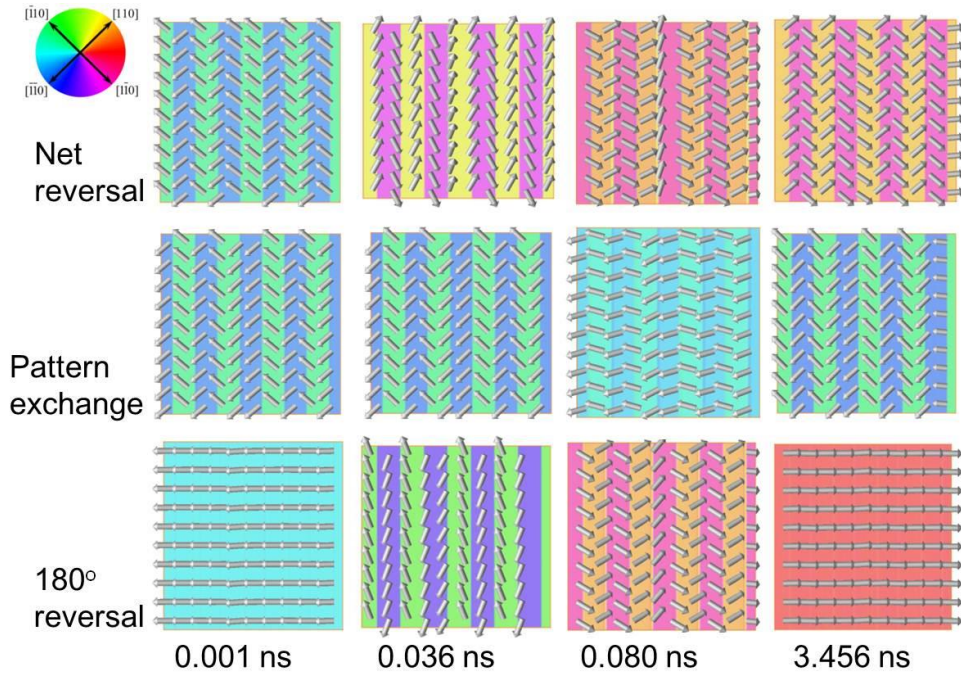

**Figure S2** Vector diagrams of local magnetization distributions at time stages of 0.001 ns, 0.036 ns, 0.080 ns, and 3.456 ns for different voltage-induced magnetic domain switching paths shown in figure 4. The background color indicates the orientation of the local magnetization vectors (see the color wheel). The magnitudes of  $\mathbf{H}_{\text{DM}}$ -field ( $h_{\text{DM}}^0$ ) are taken as 6 Oe, 500 Oe, and 1000 Oe for pattern exchange, net magnetization reversal, and  $180^\circ$  full magnetization reversal, respectively.
